# Supplementary material for: Negative elongation factor complex enables macrophage inflammatory responses by controlling anti-inflammatory gene expression
Source: PubMed Central journal article supplement (PMC7210294; doi:10.1038/s41467-020-16209-5), 2020-05-08
Supplement: 41467_2020_16209_MOESM1_ESM.pdf [file 41467_2020_16209_MOESM1_ESM.pdf]

**Supplementary information for**

**Yu et al. “Negative elongation factor complex enables macrophage inflammatory responses by controlling anti-inflammatory gene expression”**

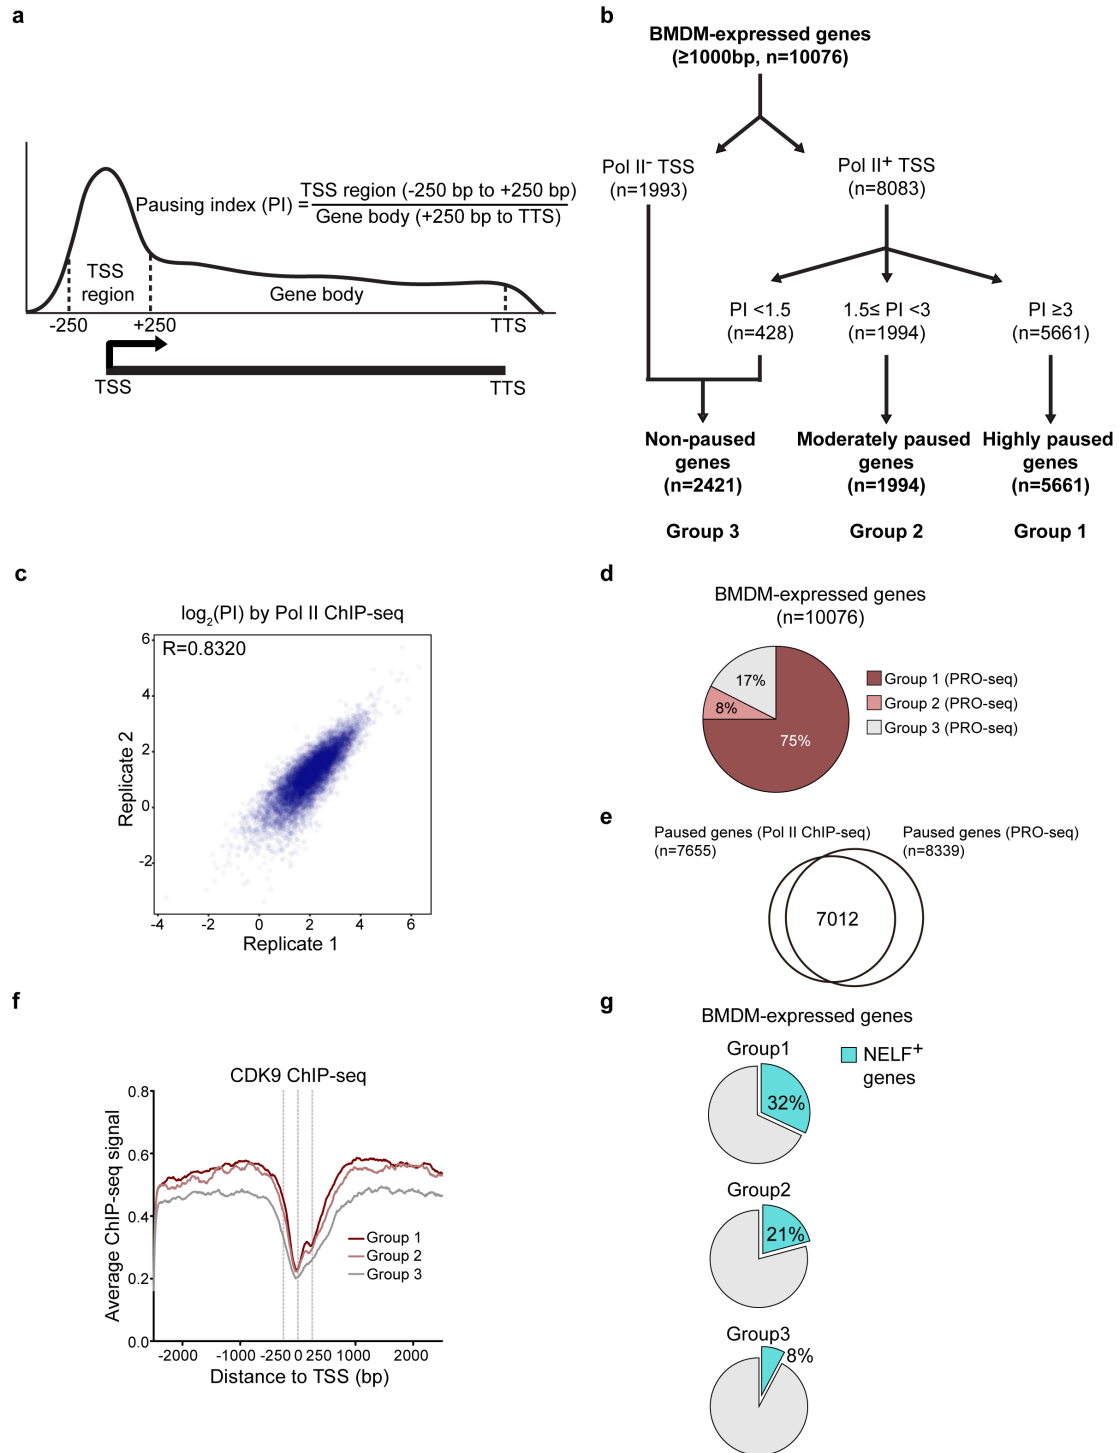

**Supplementary Figure 1. BMDM-expressed genes classified by Pol II distribution patterns.** (a) Calculation of Pol II pausing index (PI). For each gene, PI is defined as a ratio of Pol II ChIP-seq read density in the TSS region/gene body region. (b) A flow chart

shows the scheme of BMDM-expressed genes classified according to Pol II distribution in resting BMDM. Genes with  $PI \geq 3$  are defined as highly paused (group 1), and genes with  $1.5 \leq PI < 3$  as moderately paused (group 2). Genes with either  $PI < 1.5$  or TSS region lacking apparent Pol II occupancy are defined as non-paused (group 3). (c) A scatter plot shows the correlation of PI between two biological replicates in resting BMDM. x- and y-axes indicate  $\log_2$  normalized PI in replicates 1 and 2, respectively. Correlation coefficient (R) is shown. (d) Pie graph shows the percentage of all BMDM-expressed genes in each group based on PRO-seq defined PI. (e) The overlap between Pol II ChIP-seq defined and PRO-seq defined paused BMDM-expressed genes. (f) Average CDK9 ChIP-seq signals around TSS regions of group 1 (brown), group 2 (red) and group 3 (grey) genes in resting BMDM. (g) The percentage of NELF<sup>+</sup> genes in group 1, 2 and 3 of BMDM-expressed genes.

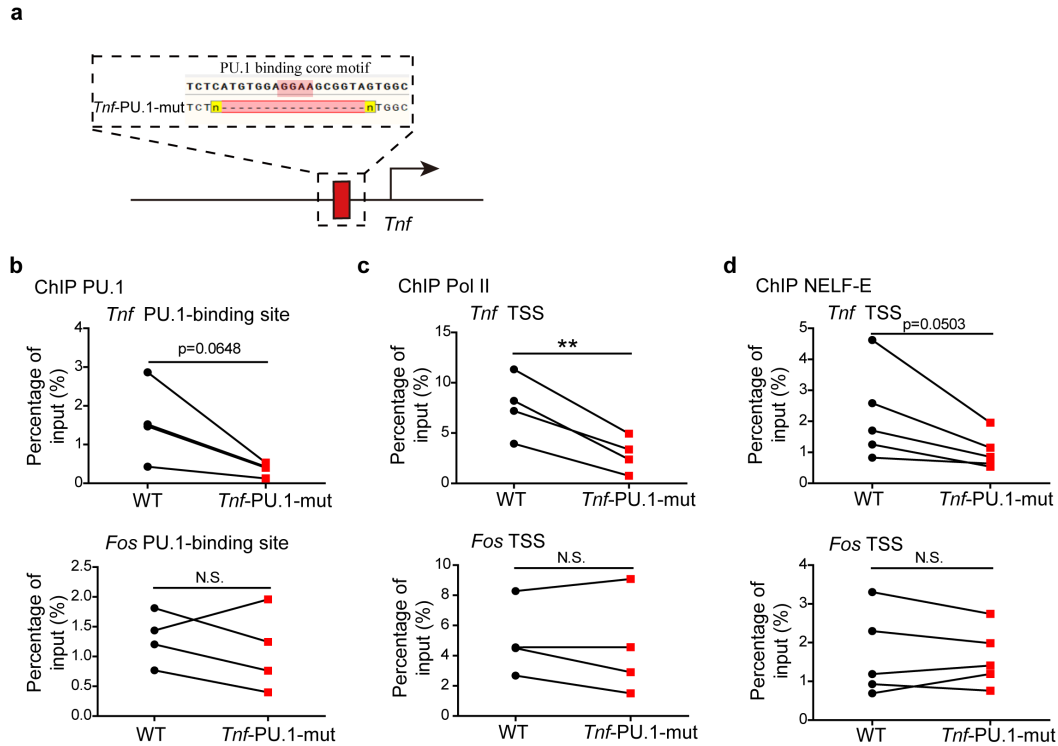

**Supplementary Figure 2. Promoter-proximal PU.1 contributes to Pol II pausing. (a)** PU.1 motif deletion in the *Tnf* promoter region (termed *Tnf*-PU.1-mut). **(b)** The occupancy of PU.1 (n=4) at the PU.1 binding site in the *Tnf* (top,  $P=0.0648$ ) and *Fos* (bottom,  $P=0.4506$ ) promoter region was assessed by ChIP-qPCR in WT and *Tnf*-PU.1-mut iBMDM. **(c, d)** The occupancy of Pol II (n=4) **(c)** and NELF-E (n=5) **(d)** in the TSS regions of *Tnf* (Pol II  $P=0.0082$ ; NELF-E  $P=0.0503$ ) and *Fos* (Pol II  $P=0.4388$ ; NELF-E  $P=0.7478$ ) was assessed by ChIP-qPCR in WT and *Tnf*-PU.1-mut iBMDM. \*\*  $P<0.01$ , N.S.  $P>0.05$  by two-sided paired Student's t test. n represents biologically independent experiments. Source data are provided as a Source Data file.

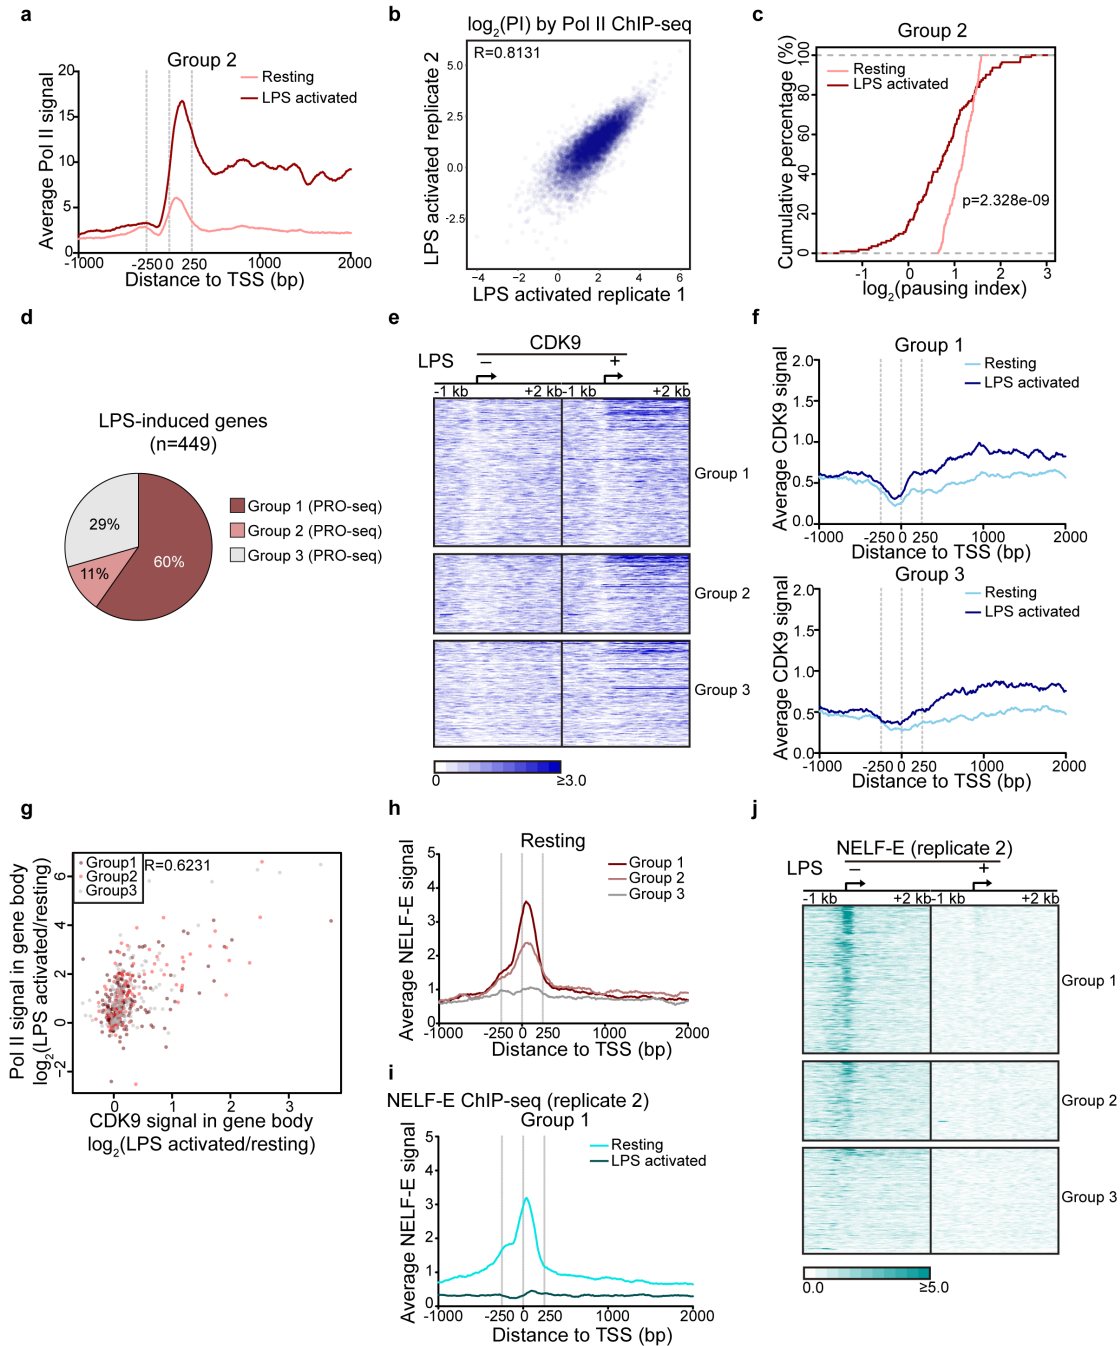

**Supplementary Figure 3. NELF dismissal during Pol II pause-release is a key feature of macrophage activation.** (a) Average Pol II ChIP-seq signals around TSS of group 2 (moderately paused) LPS-inducible genes in resting and LPS-activated (1 h) BMDM. (b) The correlation of PI between two biological replicates of Pol II ChIP-seq in LPS-3

BMDM. x- and y-axes indicate  $\log_2$  normalized PI in two replicates. Correlation coefficient (R) is shown. **(c)** The ECDF plot of Pol II PI distribution of group 2 LPS-inducible genes in resting and LPS-activated (1 h) BMDM. **(d)** The percentage of LPS-induced genes in groups 1, 2, 3 re-defined by PRO-seq. **(e)** Heat map of CDK9 ChIP-seq signals around the TSS of LPS-inducible genes in resting and LPS-activated (1 h) BMDM. For each of the three groups, the rows were sorted by the decreasing Pol II ChIP-seq signal in TSS region in resting BMDM. **(f)** Average CDK9 ChIP-seq signals around TSS regions of group 1 (top) and group 3 (bottom) genes in resting and LPS-activated (1 h) BMDM. **(g)** The correlation between CDK9 ChIP-seq signals (fold changes LPS activated/resting; x-axis) and Pol II ChIP-seq signals (fold changes LPS activated/resting; y-axis) in the bodies of genes in each group. Correlation coefficient (R) is shown. **(h)** Average NELF-E ChIP-seq (replicate 1) signals around TSS regions of group 1, 2 and 3 LPS-inducible genes, as indicated, in resting BMDM. **(i)** Average NELF-E ChIP-seq (replicate 2) signals around TSS regions of group 1 genes in resting and LPS-activated (0.5 h) BMDM. **(j)** Heat map of NELF-E (replicate 2) ChIP-seq signals around the TSS of LPS-inducible genes in resting and LPS-activated (0.5 h) BMDM. For each of the three groups, the rows were sorted by the decreasing Pol II ChIP-seq signal in TSS region in resting BMDM.

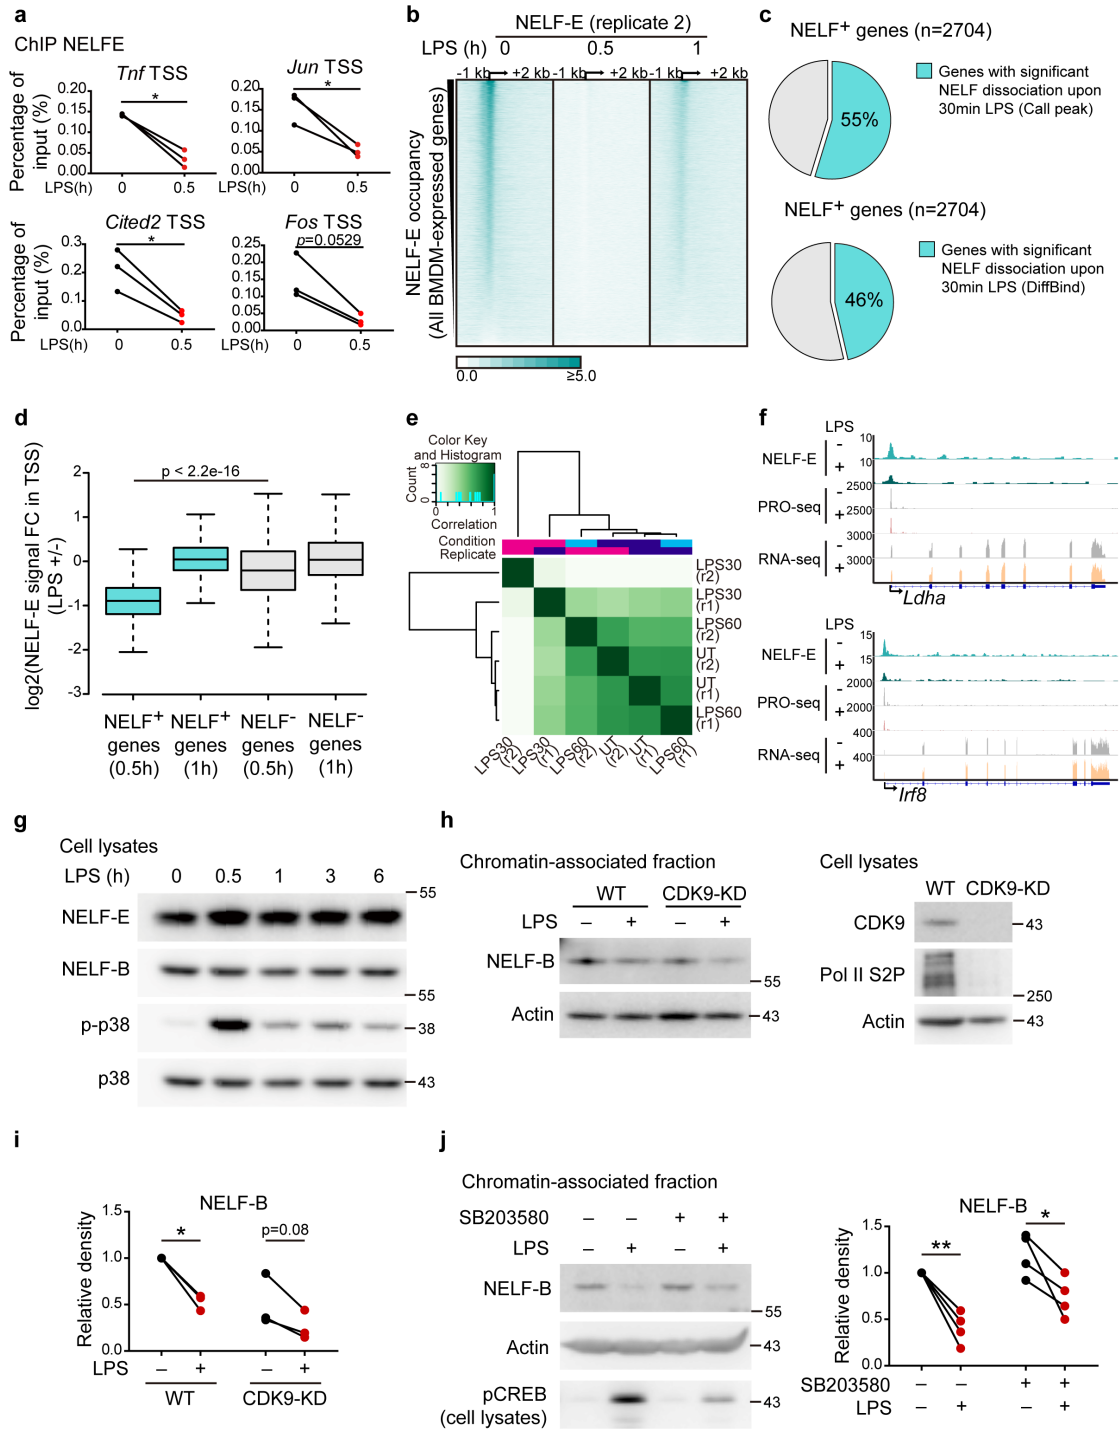

**Supplementary Figure 4. NELF is globally and transiently dismissed from chromatin upon macrophage activation.** (a) The occupancy of NELF-E (n=3) in the TSS region of *Tnf* ( $P=0.016$ ), *Jun* ( $P=0.0434$ ), *Cited2* ( $P=0.0325$ ), *Fos* ( $P=0.0529$ ) was assessed by ChIP-

qPCR in resting and LPS-activated (0.5 h) BMDM. **(b)** Heat map of NELF-E ChIP-seq (replicate 2) signals around the TSS regions of all BMDM-expressed genes in resting and LPS-activated, as indicated, BMDM. Each row indicates one gene, and the rows were sorted by the decreasing NELF-E ChIP-seq signal near TSS in resting BMDM. **(c)** Percentage of NELF<sup>+</sup> genes with significant NELF dissociation upon LPS stimulation as defined by peak calling (top) and DiffBind (bottom). **(d)** NELF-E ChIP-seq signal changes upon 0.5 h (0.5 h vs. 0 h) and 1 h (1 h vs. 0 h) LPS stimulation in TSS regions of NELF<sup>+</sup> and NELF<sup>-</sup> genes shown as boxplot. Boxes outline the data from 1<sup>st</sup> quartile to 3<sup>rd</sup> quartile, and bars indicate the boundary whose distribution is not exceeded to 1.5 fold of interquartile range extended from both 1<sup>st</sup> quartile and 3<sup>rd</sup> quartile. p-value (NELF<sup>+</sup> genes 0.5 h/NELF<sup>-</sup> genes 0.5 h  $P < 2.2e^{-16}$ ) was calculated by two-sided Mann-Whitney U test. **(e)** Correlation heat map shows the similarity of NELF-E ChIP-seq signal in TSS regions of all unique genes among samples from two replicates upon 0.5 h and 1 h LPS stimulation. **(f)** Tracks of NELF-E ChIP-seq, PRO-seq (sense strand) and RNA-seq for representative LPS non-regulated NELF<sup>+</sup> paused genes (*Ldha* and *Irf8*) in resting (-) and LPS-activated (0.5 h, +) BMDM. **(g)** NELF-E, NELF-B, p-p38 and p38 were detected by western blotting in total cell lysates of BMDM treated with LPS for indicated time. Shown is one representative blot from three biological replicates. **(h)** Chromatin-associated NELF-B and actin were detected by western blotting in WT and CDK9-KD iBMDM with or without LPS stimulation (left). CDK9, Pol II S2P and actin were visualized in total cell lysates (right). Shown is one representative blot from three biological replicates. **(i)** For each replicate from **(h)**, NELF-B bands were quantified by densitometry, normalized to internal control (actin) and expressed relative to untreated WT sample (=1) (WT LPS 0 h/WT LPS 0.5 h  $P=0.011$ ; CDK9-KD LPS 0 h/CDK9-KD LPS 0.5 h  $P=0.0814$ ). **(j)** Chromatin-associated NELF-B and actin were detected by western blotting in mock (DMSO) and SB203580 (20  $\mu$ M) –pretreated (0.5 h) BMDM; pCREB blot from total cell lysates is used as a control for SB203580 activity. Shown is one representative result from four biological



replicates (left). For each replicate, NELF-B protein level was quantified by densitometry, normalized to internal control (actin) and expressed relative to untreated sample (=1) (right) (LPS 0 h/0.5 h  $P=0.0064$ ; SB203580 pretreated LPS 0 h/LPS 0.5 h  $P=0.0463$ ). \*  $P<0.05$ , \*\*  $P<0.01$ , N.S.  $P >0.05$  by two-sided paired Student's  $t$  test. n represents biologically independent experiments. Source data are provided as a Source Data file.

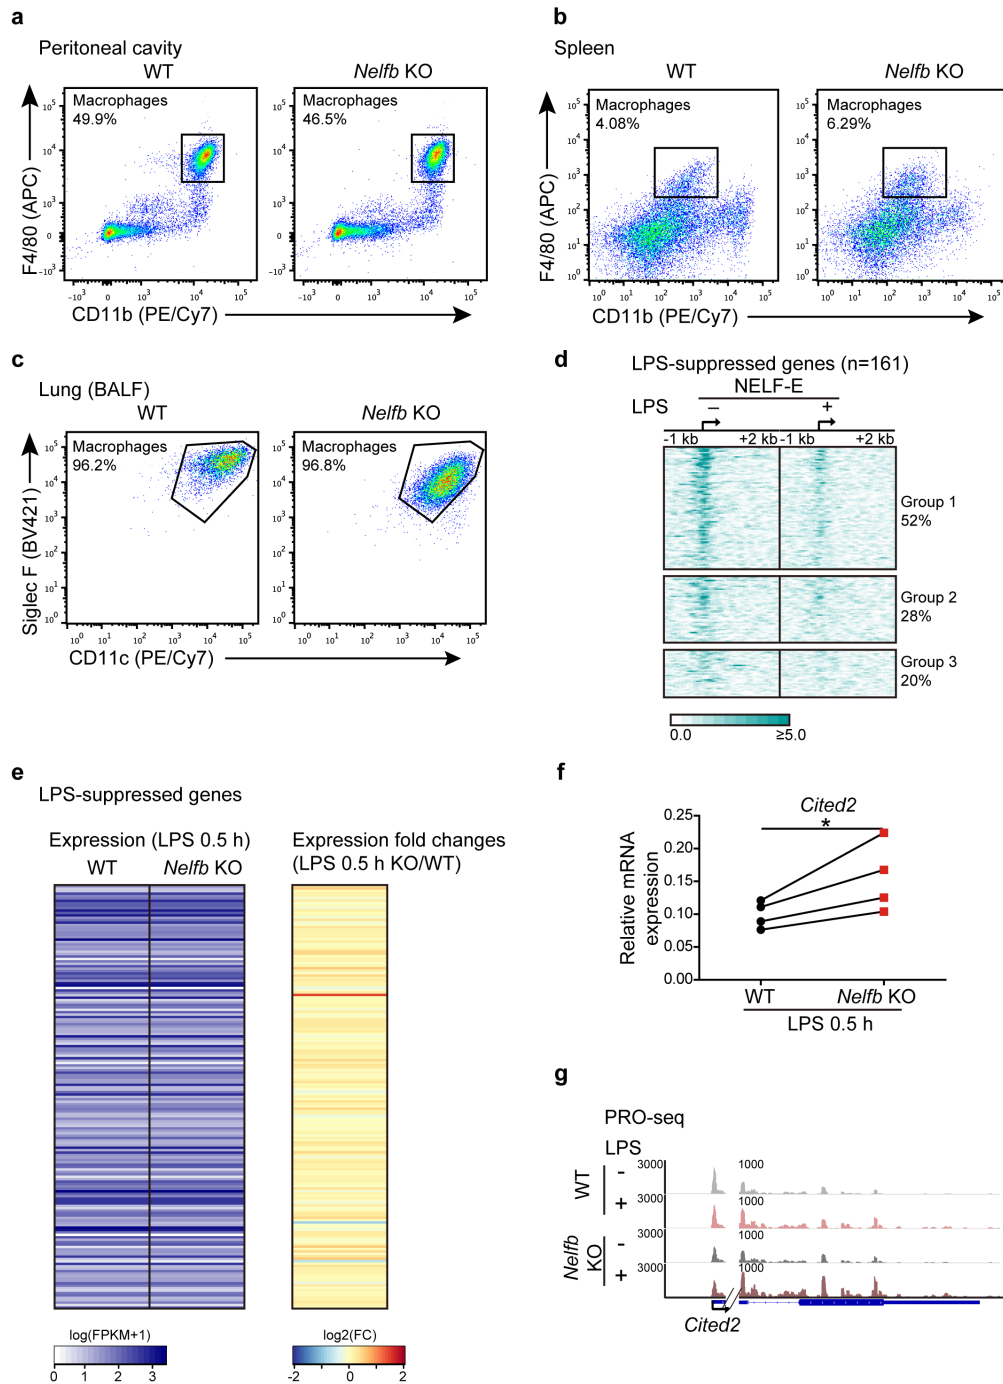

**Supplementary Figure 5. NELF is involved in the transcription of LPS-suppressed gene.** (a, b, c) FACS analysis of macrophage populations in peritoneal exudates (a: CD45<sup>+</sup>CD11b<sup>+</sup>F4/80<sup>+</sup>), spleen (b: CD45<sup>+</sup>CD11b<sup>+</sup>F4/80<sup>+</sup>) and lung (broncho-alveolar

lavage fluid, BALF) (c: CD45<sup>+</sup>CD11c<sup>+</sup>Siglec F<sup>+</sup>) in WT and *Nelfb* KO mice. (d) Heat map of NELF-E ChIP-seq signals in resting and LPS-activated (0.5 h, +) BMDM around the TSS regions of group 1, 2 and 3 LPS-suppressed genes (n=161). For each group, the rows were sorted by decreasing NELF-E ChIP-seq signal in TSS regions in resting state. (e) Heat maps show the RNA-seq expression level (FPKM+1) in WT and *Nelfb* KO (left) and fold changes (*Nelfb* KO/WT) (right) of LPS-suppressed genes in LPS-treated (0.5 h) BMDM. (f) Cumulative RT-qPCR data showing expression level of *Cited2* in WT and *Nelfb* KO BMDM treated with LPS for 0.5 h (n=4 biologically independent experiments,  $P=0.045$ ). \*  $P<0.05$  by two-sided paired Student's t test. (g) PRO-seq (sense strand) tracks for *Cited2* in WT and *Nelfb* KO BMDM cultured with (+) or without (-) LPS for 0.5 h. Source data are provided as a Source Data file.

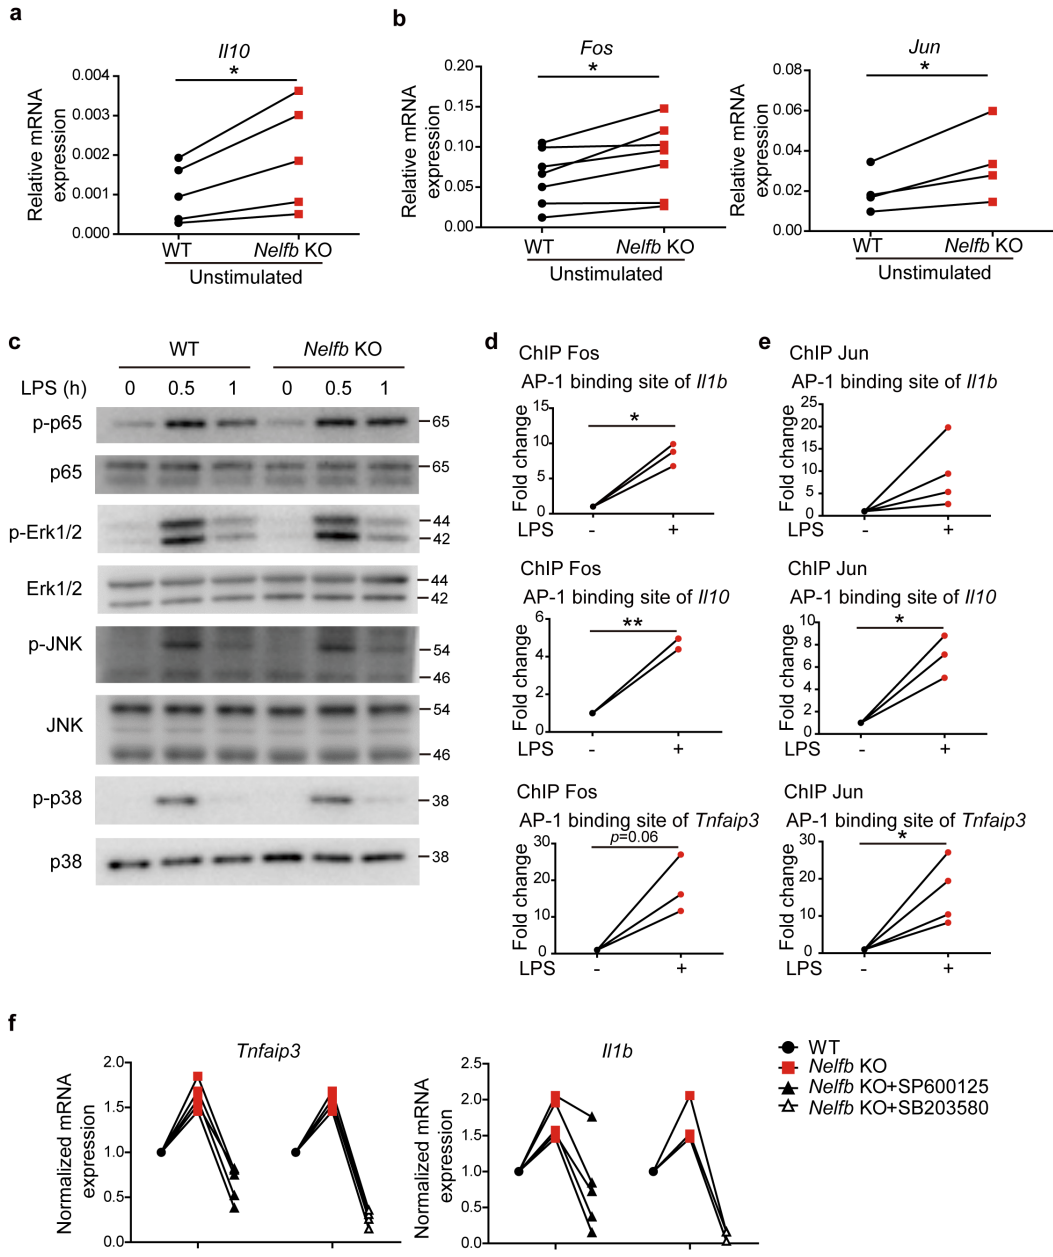

**Supplementary Figure 6. NELF deficiency does not affect TLR-induced activation of canonical signaling pathways. (a, b)** Cumulative RT-qPCR data showing expression level of *Il10* ( $n=5$ ,  $P=0.0286$ ), *Fos* ( $n=7$ ,  $P=0.0203$ ) and *Jun* ( $n=4$ ,  $P=0.0497$ ) in WT and *Nelfb* KO resting BMDM. **(c)** Immunoblot analysis of p-p65, p65, p-Erk1/2, Erk1/2, p-JNK, JNK, p-p38 and p38 in whole cell lysates of WT and *Nelfb* KO BMDM treated with

LPS for indicated time. Shown is one representative blot from three biological replicates. (d, e) Occupancies of Fos (*Il1b* n=3,  $P=0.0147$ ; *Il10* n=3,  $P=0.0025$ ; *Tnfaip3* n=4,  $P=0.0633$ ) (d) and Jun (*Il1b* n=4,  $P=0.1146$ ; *Il10* n=3,  $P=0.0316$ ; *Tnfaip3* n=4,  $P=0.0389$ ) (e) at the AP-1 binding site of *Il1b*, *Il10* and *Tnfaip3* were assessed by ChIP-qPCR in resting and LPS-activated (1 h) BMDM. (f) WT and *Nelfb* KO BMDM were pretreated with SP600125 (50  $\mu$ M) or SB203580 (20  $\mu$ M), as indicated, for 0.5 h, and *Tnfaip3* (left) and *Il1b* (right) expression following 0.5 h of LPS co-incubation was measured by RT-qPCR (SP600125-*Tnfaip3*: n=5; SP600125-*Il1b*: n=5; SB203580-*Tnfaip3*: n=4; SB203580-*Il1b*: n=3). Relative mRNA expression was normalized to the levels in WT cells that were set as 1. \*  $P<0.05$ , \*\*  $P<0.01$ , \*\*\*  $P<0.001$ , N.S.  $P>0.05$  by two-sided paired Student's *t* test. n represents biologically independent experiments. Source data are provided as a Source Data file.

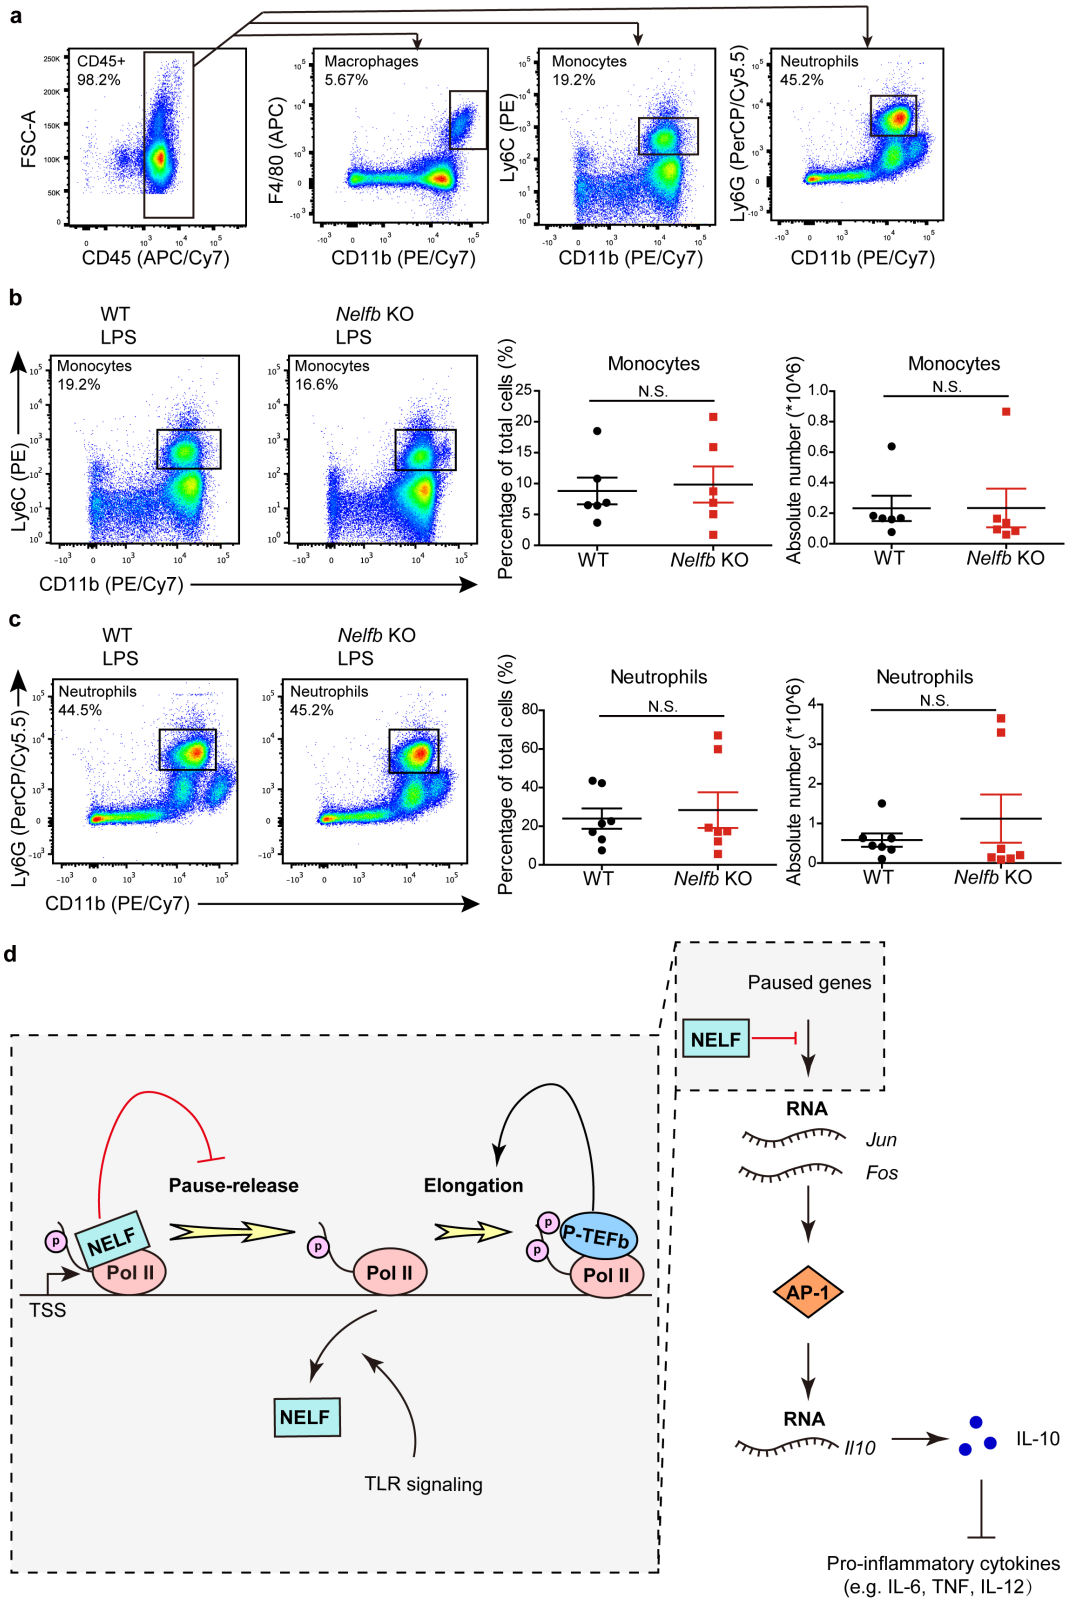

**Supplementary Figure 7. The role of NELF in peritonitis model *in vivo* and working model.** (a) Gating strategy for FACS analysis of peritoneal cells. CD45<sup>+</sup> cells were gated from the total peritoneal cells, and macrophages (F4/80<sup>+</sup>CD11b<sup>+</sup>), monocytes (CD11b<sup>+</sup>Ly6C<sup>+</sup>) and neutrophils (CD11b<sup>+</sup>Ly6G<sup>+</sup>) were subsequently gated from CD45<sup>+</sup> cells. (b, c) FACS analysis of the monocyte (b: CD45<sup>+</sup>CD11b<sup>+</sup>Ly6C<sup>+</sup>) and neutrophil (c: CD45<sup>+</sup>CD11b<sup>+</sup>Ly6G<sup>+</sup>) populations in peritoneal exudates of WT and *Nelfb* KO mice 9 h after an intraperitoneal injection of LPS (100 ng/mouse). Representative FACS distribution (left) and cumulative (monocytes: n=6; neutrophils: n=7 biologically independent animals) percentage (middle) as well as absolute cell numbers (right) are shown. N.S.  $P > 0.05$  by two-sided unpaired Student's *t* test. Error bars indicate SEM. (d) Working model: NELF-mediated post-initiation control of the pro- and anti-inflammatory regulation network. Left: Promoter-proximal Pol II pausing landscape in resting macrophages is broadly marked by NELF occupancy. LPS stimulation leads to CDK9-independent NELF dismissal from TSS regions and pause-release. P-TEFb is recruited to phosphorylate Pol II leading to transcription elongation in gene body regions. Right: NELF enforces the transcriptional pause on its direct targets, *Jun* and *Fos*, which, in turn, constrains *Il10* transcription thereby serving a permissive role in pro-inflammatory cytokine production and macrophage-mediated inflammation. Source data are provided as a Source Data file.
