# Supplementary material for: Negative elongation factor complex enables macrophage inflammatory responses by controlling anti-inflammatory gene expression
Source: PubMed Central journal article supplement (PMC7210294; doi:10.1038/s41467-020-16209-5), 2020-05-08
Supplement: 41467_2020_16209_MOESM3_ESM.pdf [file 41467_2020_16209_MOESM3_ESM.pdf]

## **Description of Additional Supplementary Files**

File Name: Supplementary Data 1

Description: Primers and oligonucleotides used in this study.
