# Supplementary material for: Negative elongation factor complex enables macrophage inflammatory responses by controlling anti-inflammatory gene expression
Source: PubMed Central journal article supplement (PMC7210294; doi:10.1038/s41467-020-16209-5), 2020-05-08
Supplement: 41467_2020_16209_MOESM5_ESM.pdf [file 41467_2020_16209_MOESM5_ESM.pdf]

## Reporting Summary

Nature Research wishes to improve the reproducibility of the work that we publish. This form provides structure for consistency and transparency in reporting. For further information on Nature Research policies, see [Authors & Referees](#) and the [Editorial Policy Checklist](#).

### Statistics

For all statistical analyses, confirm that the following items are present in the figure legend, table legend, main text, or Methods section.

- | n/a                                 | Confirmed                                                                                                                                                                                                                                                                                      |
|-------------------------------------|------------------------------------------------------------------------------------------------------------------------------------------------------------------------------------------------------------------------------------------------------------------------------------------------|
| <input type="checkbox"/>            | <input checked="" type="checkbox"/> The exact sample size ( $n$ ) for each experimental group/condition, given as a discrete number and unit of measurement                                                                                                                                    |
| <input type="checkbox"/>            | <input checked="" type="checkbox"/> A statement on whether measurements were taken from distinct samples or whether the same sample was measured repeatedly                                                                                                                                    |
| <input type="checkbox"/>            | <input checked="" type="checkbox"/> The statistical test(s) used AND whether they are one- or two-sided<br><i>Only common tests should be described solely by name; describe more complex techniques in the Methods section.</i>                                                               |
| <input type="checkbox"/>            | <input checked="" type="checkbox"/> A description of all covariates tested                                                                                                                                                                                                                     |
| <input type="checkbox"/>            | <input checked="" type="checkbox"/> A description of any assumptions or corrections, such as tests of normality and adjustment for multiple comparisons                                                                                                                                        |
| <input type="checkbox"/>            | <input checked="" type="checkbox"/> A full description of the statistical parameters including central tendency (e.g. means) or other basic estimates (e.g. regression coefficient) AND variation (e.g. standard deviation) or associated estimates of uncertainty (e.g. confidence intervals) |
| <input type="checkbox"/>            | <input checked="" type="checkbox"/> For null hypothesis testing, the test statistic (e.g. $F$ , $t$ , $r$ ) with confidence intervals, effect sizes, degrees of freedom and $P$ value noted<br><i>Give <math>P</math> values as exact values whenever suitable.</i>                            |
| <input checked="" type="checkbox"/> | <input type="checkbox"/> For Bayesian analysis, information on the choice of priors and Markov chain Monte Carlo settings                                                                                                                                                                      |
| <input checked="" type="checkbox"/> | <input type="checkbox"/> For hierarchical and complex designs, identification of the appropriate level for tests and full reporting of outcomes                                                                                                                                                |
| <input checked="" type="checkbox"/> | <input type="checkbox"/> Estimates of effect sizes (e.g. Cohen's $d$ , Pearson's $r$ ), indicating how they were calculated                                                                                                                                                                    |

*Our web collection on [statistics for biologists](#) contains articles on many of the points above.*

### Software and code

Policy information about [availability of computer code](#)

#### Data collection

qPCR data were collected by ABI ViiATM 7 Real-Time System (Life Technologies, Thermo Fisher Scientific). FACS data were collected by FACSFortessa flow cytometer (BD Biosciences). Pol II, CDK9 and NELF-E ChIP-seq data and RNA-seq data were collected by HiSeq2500 (Illumina). PU.1 ChIP-seq data were downloaded from NCBI GEO DataSet. PRO-seq data were collected by HiSeq X-ten (Illumina). Detailed information was listed in Methods.

#### Data analysis

FACS data were analyzed by Flowjo vX 0.7 software (BD Biosciences). GraphPad Prism 5 and R (3.3.0) were used for all graphing and statistical tests as indicated in Methods. Relative density of blotting bands was quantified using Image J (v1.52a) Bowtie (v1.1.2) was used to map the ChIP-seq and PRO-seq data to reference genome, and Tophat (v2.1.0) was used to map the RNA-seq data to reference genome. HOMER software package (v4.7.2) was used to visualize and quantify the ChIP-seq and PRO-seq signal. Cufflinks (v2.2.1) was used to analyze differentially expressed genes from RNA-seq data set. DiffBind (v2.12.0) was used to assess differential NELF occupancy at TSS regions.

For manuscripts utilizing custom algorithms or software that are central to the research but not yet described in published literature, software must be made available to editors/reviewers. We strongly encourage code deposition in a community repository (e.g. GitHub). See the Nature Research [guidelines for submitting code & software](#) for further information.

### Data

Policy information about [availability of data](#)

All manuscripts must include a [data availability statement](#). This statement should provide the following information, where applicable:

- Accession codes, unique identifiers, or web links for publicly available datasets
- A list of figures that have associated raw data
- A description of any restrictions on data availability

RNA-seq, NELF-E ChIP-seq, CDK9 ChIP-seq, Pol II ChIP-seq and PRO-seq data are deposited in the Genome Expression Omnibus under accession numbers GSE122292, GSE123557, GSE122300, GSE103795 and GSE123370, respectively. All data in this manuscript are available upon publication.

## Field-specific reporting

Please select the one below that is the best fit for your research. If you are not sure, read the appropriate sections before making your selection.

- Life sciences       Behavioural & social sciences       Ecological, evolutionary & environmental sciences

For a reference copy of the document with all sections, see [nature.com/documents/nr-reporting-summary-flat.pdf](https://www.nature.com/documents/nr-reporting-summary-flat.pdf)

## Life sciences study design

All studies must disclose on these points even when the disclosure is negative.

|                 |                                                                                                                                                                                                                                                                                                                                  |
|-----------------|----------------------------------------------------------------------------------------------------------------------------------------------------------------------------------------------------------------------------------------------------------------------------------------------------------------------------------|
| Sample size     | No sample size calculations were performed. To ensure reproducibility, we used at least three biological replicates for in vitro experiments. Means of independent experiments or representative data were shown in figures. For in vivo experiments, the numbers of experimental animals used are listed in the figure legends. |
| Data exclusions | No data exclusions were applied.                                                                                                                                                                                                                                                                                                 |
| Replication     | All of the experiments, expecting ChIP-seq and PRO-seq, have been repeated at least 3 times. The times of replication for each experiment were indicated in figure legend. All attempts at replication were successful.                                                                                                          |
| Randomization   | For in vitro assays, cells were randomly assigned to either experimental or control groups. For in vivo assays, WT and KO mice with the same age and sex were randomly assigned to specific treatment groups.                                                                                                                    |
| Blinding        | Investigators were not blinded during data collection as total blindness was not feasible during the animal handling process.                                                                                                                                                                                                    |

## Reporting for specific materials, systems and methods

We require information from authors about some types of materials, experimental systems and methods used in many studies. Here, indicate whether each material, system or method listed is relevant to your study. If you are not sure if a list item applies to your research, read the appropriate section before selecting a response.

### Materials & experimental systems

| n/a                                 | Involved in the study                                           |
|-------------------------------------|-----------------------------------------------------------------|
| <input type="checkbox"/>            | <input checked="" type="checkbox"/> Antibodies                  |
| <input type="checkbox"/>            | <input checked="" type="checkbox"/> Eukaryotic cell lines       |
| <input checked="" type="checkbox"/> | <input type="checkbox"/> Palaeontology                          |
| <input type="checkbox"/>            | <input checked="" type="checkbox"/> Animals and other organisms |
| <input checked="" type="checkbox"/> | <input type="checkbox"/> Human research participants            |
| <input checked="" type="checkbox"/> | <input type="checkbox"/> Clinical data                          |

### Methods

| n/a                                 | Involved in the study                              |
|-------------------------------------|----------------------------------------------------|
| <input type="checkbox"/>            | <input checked="" type="checkbox"/> ChIP-seq       |
| <input type="checkbox"/>            | <input checked="" type="checkbox"/> Flow cytometry |
| <input checked="" type="checkbox"/> | <input type="checkbox"/> MRI-based neuroimaging    |

## Antibodies

### Antibodies used

Anti-p38a(C-20)(sc-535), anti-PU.1(T-21)(sc-352), anti-Pol II(sc-9001x), anti-CDK9(H169)(sc-8338), anti-NELF-E(F9)(sc-377052) antibodies were from Santa Cruz Biotechnology. Anti-NELF-B(ab167401) and anti-RNA polymerase II CTD repeat YSPTSPS (phospho S2)(ab5095) antibodies were from Abcam. Anti-NELF-E antibody from Proteintech (10705-1-AP) was also used as indicated. Anti-Ly-6G(560602), anti-Ly6C(560592) and anti-Siglec F(562681) were from BD Bioscience. Anti-CD11b(101216) and anti-CD45R(103116) were from BioLegend. Anti-F4/80(17-4801) and anti-CD11c(25-0114-82) were from eBioscience. Anti-c-Fos(9F6)(2250), anti-c-Jun(60A8)(9165), anti-phospho-p38 MAPK(Thr180/Tyr182)(9215), anti-phospho-NF-κB p65(Ser536)(93H1)(3033), anti-NF-κB p65(C22B4)(4764), anti-phospho-CREB(Ser133)(87G3)(9198), anti-phospho-p44/42 MAPK(Erk1/2)(Thr202/Tyr204)(9101), anti-p44/42 MAPK(Erk1/2)(9102), anti-phospho-SAPK/JNK(Thr183/Tyr185)(9251), anti-SAPK/JNK(9252) antibodies were from Cell Signaling Technology. Anti-mouse IL-10R(CD210)(BE0050) was from BioXCell, and anti-actin(AC026) was from ABclonal.

### Validation

No test data was added to the manuscript. Validation information for each antibody can be found in manufacturer's website as listed below.

Anti-p38a(C-20)(sc-535), <https://www.scbt.com/p/p38alpha-antibody-c-20>

Anti-PU.1(T-21)(sc-352), <https://www.scbt.com/zh/p/pu-1-antibody-t-21>

Anti-Pol II(sc-9001x), <https://www.scbt.com/zh/p/pol-ii-antibody-h-224>

Anti-CDK9(H169)(sc-8338), <https://www.scbt.com/zh/p/cdk9-antibody-h-169>

Anti-NELF-E(F9)(sc-377052), <https://www.scbt.com/zh/p/nelf-e-antibody-f-9>

Anti-NELF-B(ab167401), <https://www.abcam.com/nelf-b-antibody-epr11200-ab167401.html>

Anti-RNA polymerase II CTD repeat YSPTSPS (phospho S2)(ab5095), <https://www.abcam.com/rna-polymerase-ii-ctd-repeat-ysptsp-phospho-s2-antibody-chip-grade-ab5095.html>

Anti-NELF-E (Proteintech, 10705-1-AP), <https://www.ptglab.com/Products/RDBP-Antibody-10705-1-AP.htm>  
 Anti-Ly-6G(560602), <https://www.bdbiosciences.com/cn/reagents/research/antibodies-buffers/immunology-reagents/anti-mouse-antibodies/cell-surface-antigens/percp-cy55-rat-anti-mouse-ly-6g-1a8/p/560602>  
 Anti-Ly6C(560592), <https://www.bdbiosciences.com/cn/reagents/research/antibodies-buffers/immunology-reagents/anti-mouse-antibodies/cell-surface-antigens/pe-rat-anti-mouse-ly-6c-al-21/p/560592>  
 Anti-Siglec F(562681), <https://www.bdbiosciences.com/cn/applications/research/b-cell-research/surface-markers/mouse/bv421-rat-anti-mouse-siglec-f-e50-2440/p/562681>  
 Anti-CD11b(101216), <https://www.biolegend.com/en-us/products/pe-cy7-anti-mouse-human-cd11b-antibody-1921>  
 Anti-CD45R(103116), <https://www.biolegend.com/en-us/products/apc-cyanine7-anti-mouse-cd45-antibody-2530>  
 Anti-F4/80(17-4801), <https://www.thermofisher.com/cn/zh/antibody/product/F4-80-Antibody-clone-BM8-Monoclonal/17-4801-80>  
 Anti-CD11c(25-0114-82), <https://www.thermofisher.com/cn/zh/antibody/product/CD11c-Antibody-clone-N418-Monoclonal/25-0114-82>  
 Anti-c-Fos(9F6)(2250), <https://www.cst-c.com.cn/products/primary-antibodies/c-fos-9f6-rabbit-mab/2250>  
 Anti-c-Jun(60A8)(9165), <https://www.cst-c.com.cn/products/primary-antibodies/c-jun-60a8-rabbit-mab/9165>  
 Anti-phospho-p38 MAPK(Thr180/Tyr182)(9215), <https://www.cst-c.com.cn/products/primary-antibodies/phospho-p38-mapk-thr180-tyr182-3d7-rabbit-mab/9215>  
 Anti-phospho-NF-κB p65(Ser536)(93H1)(3033), <https://www.cst-c.com.cn/products/primary-antibodies/phospho-nf-kb-p65-ser536-93h1-rabbit-mab/3033>  
 Anti-NF-κB p65(C22B4)(4764), <https://www.cst-c.com.cn/products/primary-antibodies/nf-kb-p65-c22b4-rabbit-mab/4764>  
 Anti-phospho-CREB(Ser133)(87G3)(9198), <https://www.cst-c.com.cn/products/primary-antibodies/phospho-creb-ser133-87g3-rabbit-mab/9198>  
 Anti-phospho-p44/42 MAPK(Erk1/2)(Thr202/Tyr204)(9101), <https://www.cst-c.com.cn/products/primary-antibodies/phospho-p44-42-mapk-erk1-2-thr202-tyr204-antibody/9101>  
 Anti-p44/42 MAPK(Erk1/2)(9102), <https://www.cst-c.com.cn/products/primary-antibodies/p44-42-mapk-erk1-2-antibody/9102>  
 Anti-phospho-SAPK/JNK(Thr183/Tyr185)(9251), <https://www.cst-c.com.cn/products/primary-antibodies/phospho-sapk-jnk-thr183-tyr185-antibody/9251>  
 Anti-SAPK/JNK(9252), <https://www.cst-c.com.cn/products/primary-antibodies/sapk-jnk-antibody/9252>  
 Anti-mouse IL-10R(CD210)(BE0050) BioXCell, <https://bxccl.com/product/m-il-10r/>  
 Anti-actin(AC026) ABclonal, <https://abclonal.com.cn/catalog/AC026>

## Eukaryotic cell lines

Policy information about [cell lines](#)

|                                                                      |                                                                                            |
|----------------------------------------------------------------------|--------------------------------------------------------------------------------------------|
| Cell line source(s)                                                  | Immortalized bone marrow-derived macrophages (iBMDM) were generated from WT C57BL/6J mice. |
| Authentication                                                       | This cell line was generated in house and was not authenticated.                           |
| Mycoplasma contamination                                             | Cell lines were tested negative for mycoplasma contamination.                              |
| Commonly misidentified lines<br>(See <a href="#">ICLAC</a> register) | No commonly misidentified lines were used in this study.                                   |

## Animals and other organisms

Policy information about [studies involving animals](#); [ARRIVE guidelines](#) recommended for reporting animal research

|                         |                                                                                                                                                                                                                                                                                                                                                                                                                  |
|-------------------------|------------------------------------------------------------------------------------------------------------------------------------------------------------------------------------------------------------------------------------------------------------------------------------------------------------------------------------------------------------------------------------------------------------------|
| Laboratory animals      | Nelfb flox/flox mice were generated by Dr. Rong Li's laboratory. Myd88 <sup>-/-</sup> and Lyz2-Cre mice were obtained from Jackson Laboratory. Mice were housed in individually ventilated cages in a temperature and light regulated room (20-26°C, humidity 40-70% and dark/light=12/12) in a SPF facility and received food and water ad libitum in Laboratory Animal Research Center of Tsinghua University. |
| Wild animals            | This study did not involve wild animals.                                                                                                                                                                                                                                                                                                                                                                         |
| Field-collected samples | This study did not involve samples collected from fields.                                                                                                                                                                                                                                                                                                                                                        |
| Ethics oversight        | The experiments using mice were approved by the Institutional Animal Care and Use Committee at Tsinghua University.                                                                                                                                                                                                                                                                                              |

Note that full information on the approval of the study protocol must also be provided in the manuscript.

## ChIP-seq

### Data deposition

- Confirm that both raw and final processed data have been deposited in a public database such as [GEO](#).  
 Confirm that you have deposited or provided access to graph files (e.g. BED files) for the called peaks.

## Data access links

May remain private before publication.

NELF-E ChIP-seq <https://www.ncbi.nlm.nih.gov/geo/query/acc.cgi?acc=GSE123557> and the password is qrcfmuuutrgtfkv  
 CDK9 ChIP-seq <https://www.ncbi.nlm.nih.gov/geo/query/acc.cgi?acc=GSE122300> and the password is ijyppiyzbexjqz  
 PolII ChIP-seq <https://www.ncbi.nlm.nih.gov/geo/query/acc.cgi?acc=GSE103795> and the password is idgfsuywzwwplcr  
 PRO-seq <https://www.ncbi.nlm.nih.gov/geo/query/acc.cgi?acc=GSE123370> and the password is yhglswoubpalxsr  
 RNA-seq <https://www.ncbi.nlm.nih.gov/geo/query/acc.cgi?acc=GSE122292> and the password is wbatgkexpcjgpgf

## Files in database submission

Files File type  
 PolII\_UT\_rep1.tar.gz Fastq  
 PolII\_UT\_rep2.tar.gz Fastq  
 PolII\_LPS\_rep1.tar.gz Fastq  
 PolII\_LPS\_rep2.tar.gz Fastq  
 PolII\_UT\_rep1.ucsc.bedGraph.gz bedGraph  
 PolII\_UT\_rep2.ucsc.bedGraph.gz bedGraph  
 PolII\_LPS\_rep1.ucsc.bedGraph.gz bedGraph  
 PolII\_LPS\_rep2.ucsc.bedGraph.gz bedGraph  
 NELF\_Input\_S5\_L001\_R1\_001.fastq Fastq  
 NELF\_UT\_rep1.fastq Fastq  
 NELF\_UT\_rep1\_S10\_L002\_R1\_001.fastq Fastq  
 NELF\_L30\_rep1.fastq Fastq  
 NELF\_L30\_rep1\_S9\_L002\_R1\_001.fastq Fastq  
 NELF\_L60\_rep1.fastq Fastq  
 NELF\_L60\_rep1\_S8\_L002\_R1\_001.fastq Fastq  
 NELF\_UT\_rep2\_S1\_L008\_R1\_001.fastq Fastq  
 NELF\_UT\_rep2\_S1\_run2\_L005\_R1\_001.fastq Fastq  
 NELF\_L30\_rep2\_S2\_L008\_R1\_001.fastq Fastq  
 NELF\_L30\_rep2\_run2\_S2\_L005\_R1\_001.fastq Fastq  
 NELF\_L60\_rep2\_S3\_L008\_R1\_001.fastq Fastq  
 NELF\_L60\_rep2\_run2\_S3\_L005\_R1\_001.fastq Fastq  
 NELF\_UT\_rep1.ucsc.bedGraph.gz bedGraph  
 NELF\_L30\_rep1.ucsc.bedGraph.gz bedGraph  
 NELF\_L60\_rep1.ucsc.bedGraph.gz bedGraph  
 NELF\_UT\_rep2.ucsc.bedGraph.gz bedGraph  
 NELF\_L30\_rep2.ucsc.bedGraph.gz bedGraph  
 NELF\_L60\_rep2.ucsc.bedGraph.gz bedGraph  
 CDK9\_UT.fastq.gz Fastq  
 CDK9\_L60.fastq.gz Fastq  
 CDK9\_UT.fastq.gz Fastq  
 CDK9\_L60.fastq.gz Fastq  
 CDK9\_UT.bedGraph.gz bedGraph  
 CDK9\_L60.bedGraph.gz bedGraph

Genome browser session  
(e.g. [UCSC](https://genome.ucsc.edu))

[http://genome.ucsc.edu/cgi-bin/hgTracks?db=mm10&lastVirtModeType=default&lastVirtModeExtraState=&virtModeType=default&virtMode=0&nonVirtPosition=&position=chr1%3A3000470-3001063&hgsid=716297353\\_A3BSATf2E7cNv0CLppD9qSduHWuc](http://genome.ucsc.edu/cgi-bin/hgTracks?db=mm10&lastVirtModeType=default&lastVirtModeExtraState=&virtModeType=default&virtMode=0&nonVirtPosition=&position=chr1%3A3000470-3001063&hgsid=716297353_A3BSATf2E7cNv0CLppD9qSduHWuc)

## Methodology

## Replicates

Pol II ChIPseq (2 biological replicates for each conditions), NELF-E ChIPseq (2 biological replicates for each conditions), CDK9 ChIPseq (one replicate)

## Sequencing depth

| Samples        | Total reads | Uniquely mapped reads | Length        |
|----------------|-------------|-----------------------|---------------|
| PolII_UT_rep1  | 91040220    | 67080518              | Single-end 50 |
| PolII_UT_rep2  | 92349914    | 65557897              | Single-end 50 |
| PolII_LPS_rep1 | 95355253    | 69452059              | Single-end 50 |
| PolII_LPS_rep2 | 96114864    | 66920965              | Single-end 50 |
| NELF_Input     | 74540651    | 51388956              | Single-end 50 |
| NELF_UT_rep1   | 88685924    | 58430837              | Single-end 50 |
| NELF_L30_rep1  | 70212340    | 46730418              | Single-end 50 |
| NELF_L60_rep1  | 83921847    | 56597077              | Single-end 50 |
| NELF_UT_rep2   | 162422256   | 96829803              | Single-end 50 |
| NELF_L30_rep2  | 104392003   | 71356586              | Single-end 50 |
| NELF_L60_rep2  | 121102156   | 80337260              | Single-end 50 |
| CDK9_UT        | 64164547    | 40888594              | Single-end 50 |
| CDK9_L60       | 61091204    | 40346767              | Single-end 50 |

## Antibodies

Pol II (sc-9001x, Santa Cruz), NELF-E (F9 sc-377052, Santa Cruz), CDK9 (H-169 sc-8338, Santa Cruz)

|                         |                                                                                                                                                                                                                                                                                                                                                   |
|-------------------------|---------------------------------------------------------------------------------------------------------------------------------------------------------------------------------------------------------------------------------------------------------------------------------------------------------------------------------------------------|
| Peak calling parameters | ChIP-seq reads in fastq files were aligned to mouse genome (UCSC mm10) using Bowtie (version 1.1.2) to generate alignment files of uniquely mapped reads with maximum allowed mismatch of 2 (-m 1 -n 2) for each data set. Peak calling was applied to NELF-E ChIPseq data set, which was implemented by HOMER with FDR>0.001 to input condition. |
| Data quality            | For Pol II ChIPseq data sets, we tested the correlation for ChIPseq signals every 10kb across the genome between two biological replicates for each conditions, and correlation coefficient (R) for untreated condition is 0.99 and for LPS stimulated condition is 0.85.                                                                         |
| Software                | Mapping: Bowtie (version 1.1.2); peak calling: findPeaks program in HOMER (v4.7.2)                                                                                                                                                                                                                                                                |

## Flow Cytometry

### Plots

Confirm that:

- The axis labels state the marker and fluorochrome used (e.g. CD4-FITC).
- The axis scales are clearly visible. Include numbers along axes only for bottom left plot of group (a 'group' is an analysis of identical markers).
- All plots are contour plots with outliers or pseudocolor plots.
- A numerical value for number of cells or percentage (with statistics) is provided.

### Methodology

|                           |                                                                                                                                                                                                                                                                                                                             |
|---------------------------|-----------------------------------------------------------------------------------------------------------------------------------------------------------------------------------------------------------------------------------------------------------------------------------------------------------------------------|
| Sample preparation        | Single cell suspensions were made from organs (spleen, lung) or isolated from peritoneal cavity.                                                                                                                                                                                                                            |
| Instrument                | FACSFortessa flow cytometer (BD Biosciences)                                                                                                                                                                                                                                                                                |
| Software                  | Flowjo software (BD Biosciences)                                                                                                                                                                                                                                                                                            |
| Cell population abundance | No sorting was performed. For population abundance in FACS analysis experiments, see specific figures for detailed information.                                                                                                                                                                                             |
| Gating strategy           | Cells were gated first on FSC-A versus SSC-A to determine include all viable cells (P1), on FSC-H versus FCS-W to eliminate doublets (P2), and then on APC-Cy7 (CD45) versus FSC-A to specify leukocytes (P3). The following gating strategies are antibodiespecific for determination of specific immune cell populations. |

- Tick this box to confirm that a figure exemplifying the gating strategy is provided in the Supplementary Information.
